# Supplementary material
Source: Springer Nature journal article supplement (https://www.springerprofessional.de/resource/supplementary/13638_2013_814_MOESM13_ESM.pdf/11898520)

## Advanced Base Station

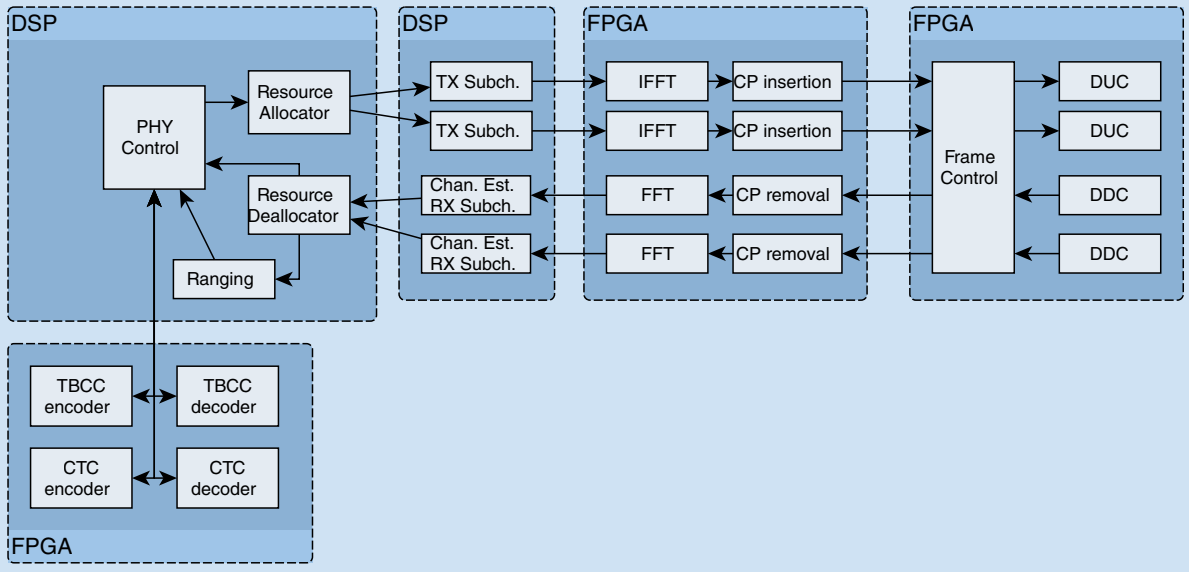

## Advanced Mobile Station

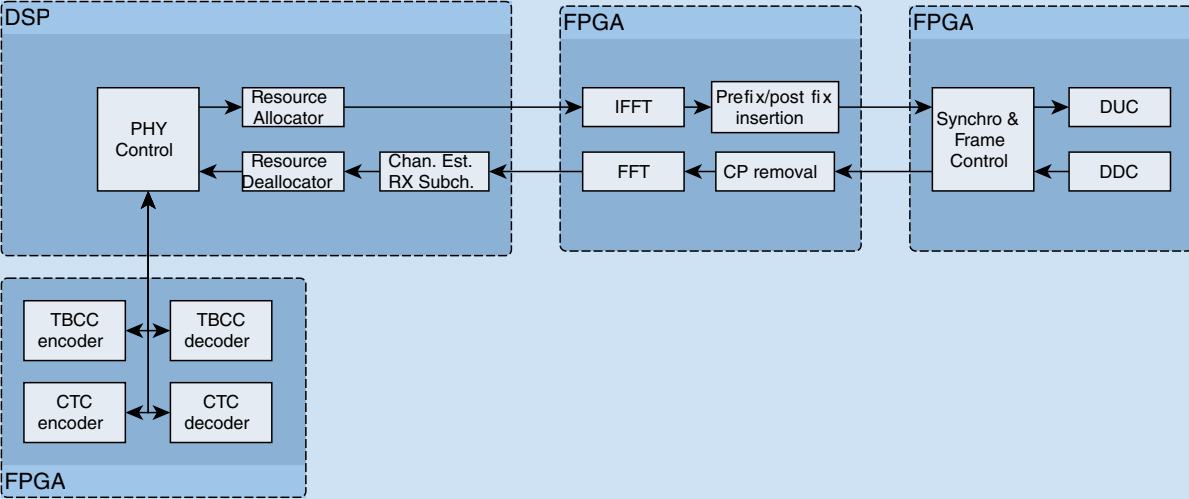

Supplement: MOESM13 [file 11898520]
